# Supplementary material for: Partially reduced graphene oxide and chitosan nanohybrid membranes for selective retention of divalent cations
Source: Royal Society of Chemistry journal article supplement (doi:10.1039/c8ra01916a), 2018-01-01
Supplement: c8ra01916a1.pdf [file c8ra01916a1.pdf]

## Supporting Information for

### **Partially reduced graphene oxide and chitosan nanohybrid membranes for selective retention for divalent cations**

Yangyang Wei <sup>a</sup>, Jian Wang <sup>a</sup>, Hao Li <sup>a</sup>, Man Zhao <sup>a</sup>, Huifeng Zhang <sup>a</sup>, Yipeng Guan <sup>a</sup>,

Hai Huang <sup>a</sup>, Baoxia Mi <sup>b</sup>, Yushan Zhang<sup>\*a</sup>

<sup>a</sup>The Institute of Seawater Desalination and Multipurpose Utilization, State Oceanic  
Administration, Tianjin 300192, China

<sup>b</sup>Department of Civil and Environmental Engineering, University of California, Berkeley, CA  
94720

\* *Corresponding author, email: yszhang\_membr@163.com; Tel: +86-022-87898159*

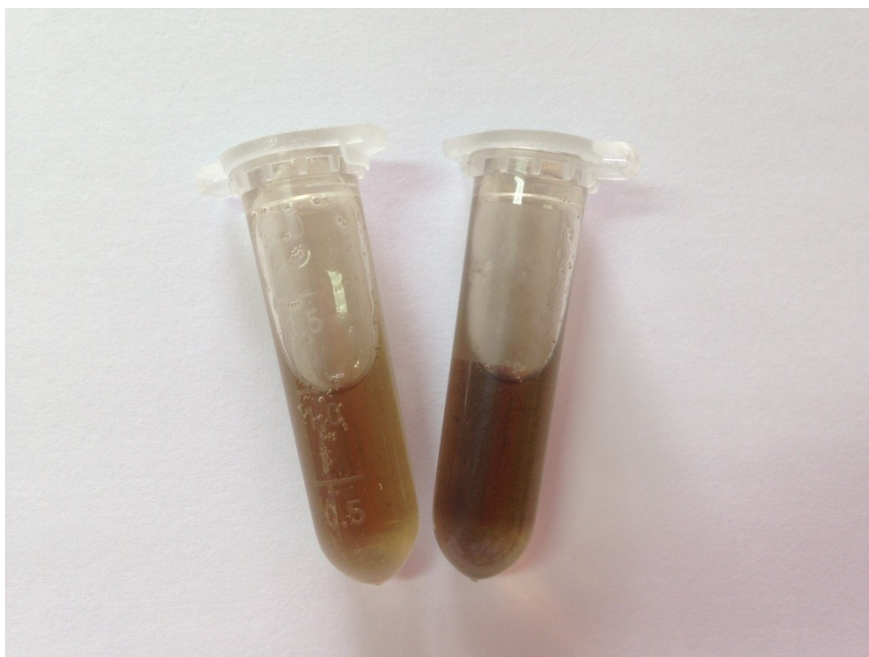

Fig. S1 Digital photograph of GO (left) and prGO (right) solution with the same concentration of  $0.2 \text{ mg mL}^{-1}$ .

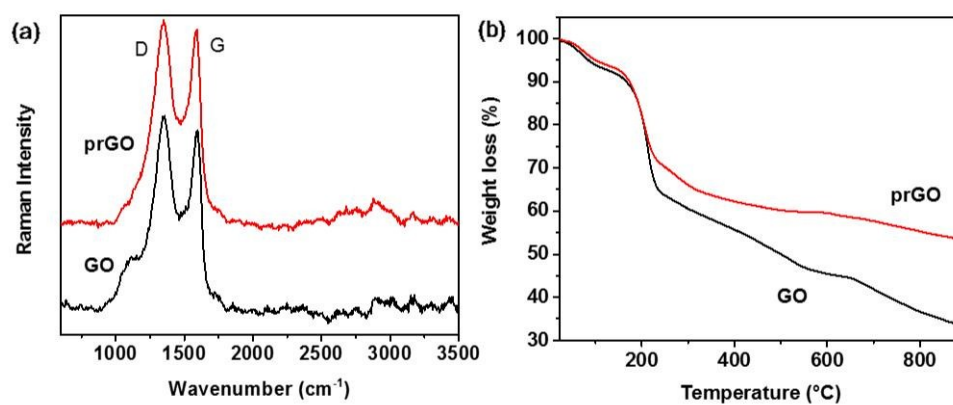

Fig. S2 (a) Raman spectra of GO and prGO, (b) TGA plots of GO and prGO.

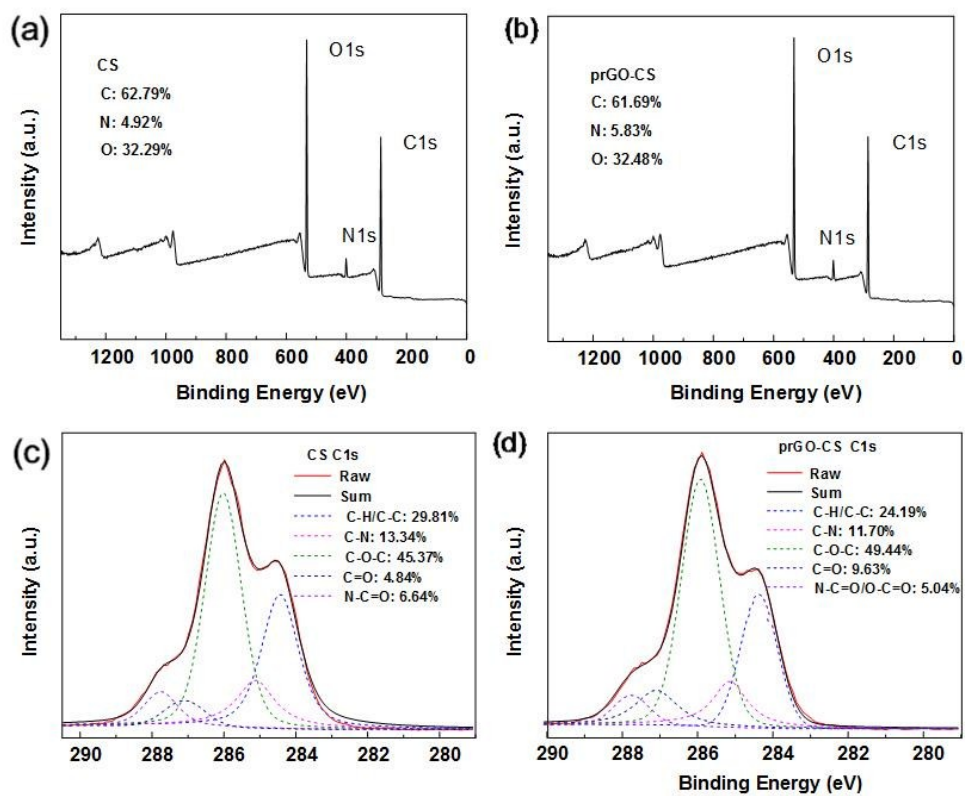

Fig. S3 XPS spectra at a wide scanning range for (a) CS and (b) prGO-CS membrane. XPS survey spectra of C1s for (d) CS and (e) prGO-CS membranes.

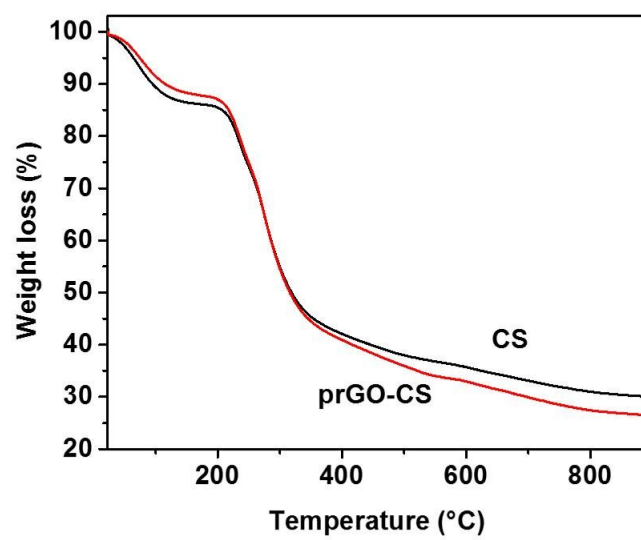

Fig. S4 (a) TGA plots of CS and prGO-CS.
